# Supplementary material for: Rapid and Visual Detection of Type 2 Porcine Reproductive and Respiratory Syndrome Virus by Real-Time Fluorescence-Based Reverse Transcription Recombinase-Aided Amplification
Source: MDPI journal article supplement (doi:10.3390/v14112526), 2022-11-15
Supplement: s1 [file s1]

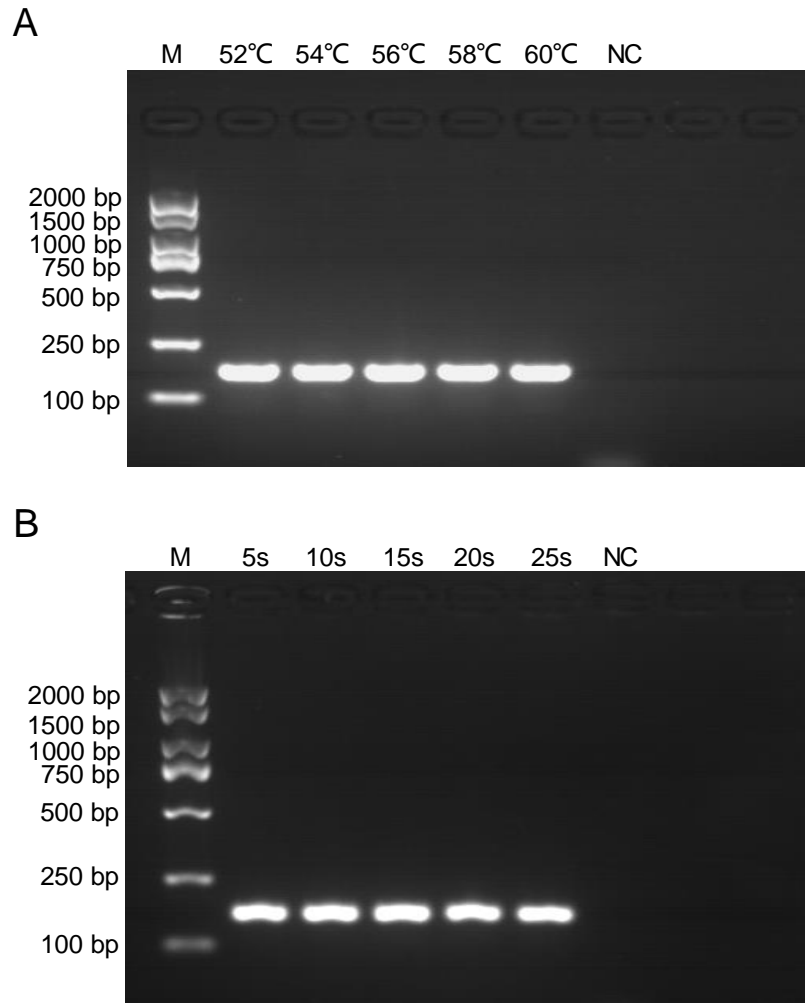

**Figure S1.** Optimization of reaction conditions for PRRSV detection of RT-PCR. **(A)** Agarose gel electrophoresis results of RT-PCR under different annealing temperatures. The bands were similar to each other, and 56 °C were used in the final program. **(B)** Agarose gel electrophoresis results of RT-PCR using different extension times. The band from an extension time of 15 s was relatively brighter, so the final extension time of RT-PCR program was set as 15 s. NC, negative control. The cDNA of PRRSV JXA1 was used as a template for each PCR reaction.

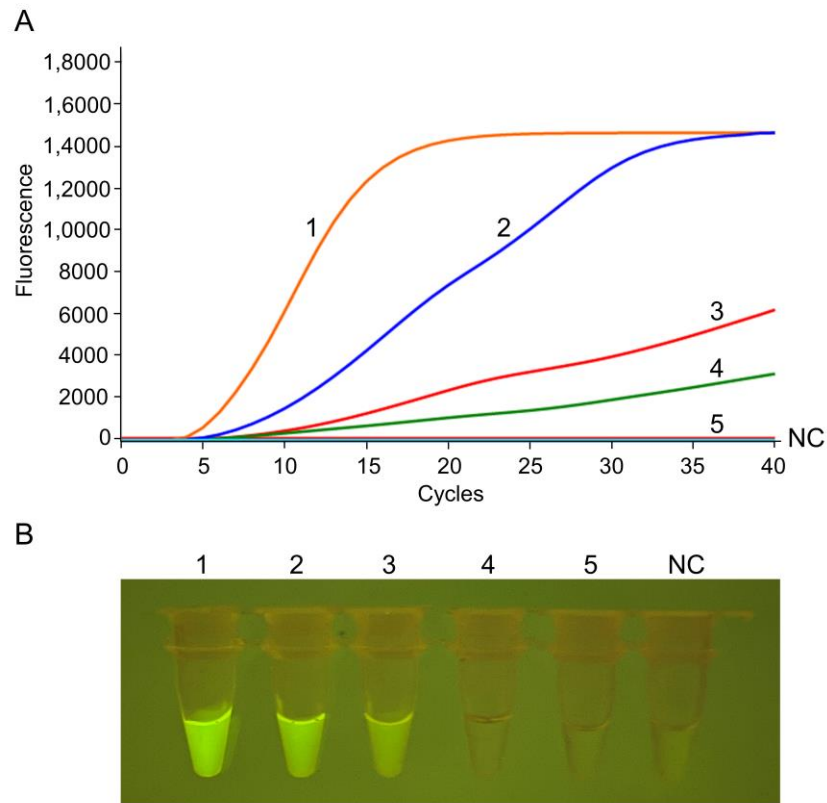

**Figure S2.** Sensitivity of RF-RT-RAA for PRRSV-2 detection using viral RNA templates. **(A)** Sensitivity test of RF-RT-RAA through real-time fluorescence read-out. **(B)** Sensitivity test of RF-RT-RAA through visual observation. The image was captured by a mobile phone camera. Curves or tubes 1-5: RF-RT-RAA detection results with viral RNA templates of  $10^{3.5}$ – $10^{-0.5}$  TCID<sub>50</sub>/mL, respectively. NC, negative control.
